# Supplementary material for: The C-terminal region of the non-structural protein 2B from Hepatitis A Virus demonstrates lipid-specific viroporin-like activity
Source: PubMed Central journal article supplement (PMC4626808; doi:10.1038/srep15884), 2015-10-30
Supplement: srep15884-s1.pdf [file srep15884-s1.pdf]

**The C-terminal region of the non-structural protein 2B from Hepatitis A Virus demonstrates lipid-specific viroporin-like activity**

Ashutosh Shukla, Debajit Dey, Kamalika Banerjee, Anshu Nain and Manidipa Banerjee#

Kusuma School of Biological Sciences, Indian Institute of Technology-Delhi, Hauz Khas, New Delhi -110016, India

# Corresponding author

Telephone: 91-11-26597538

Fax: 91-11-26597530

E-mail: [mbanerjee@bioschool.iitd.ac.in](mailto:mbanerjee@bioschool.iitd.ac.in)

## Supplementary Figures and legends:

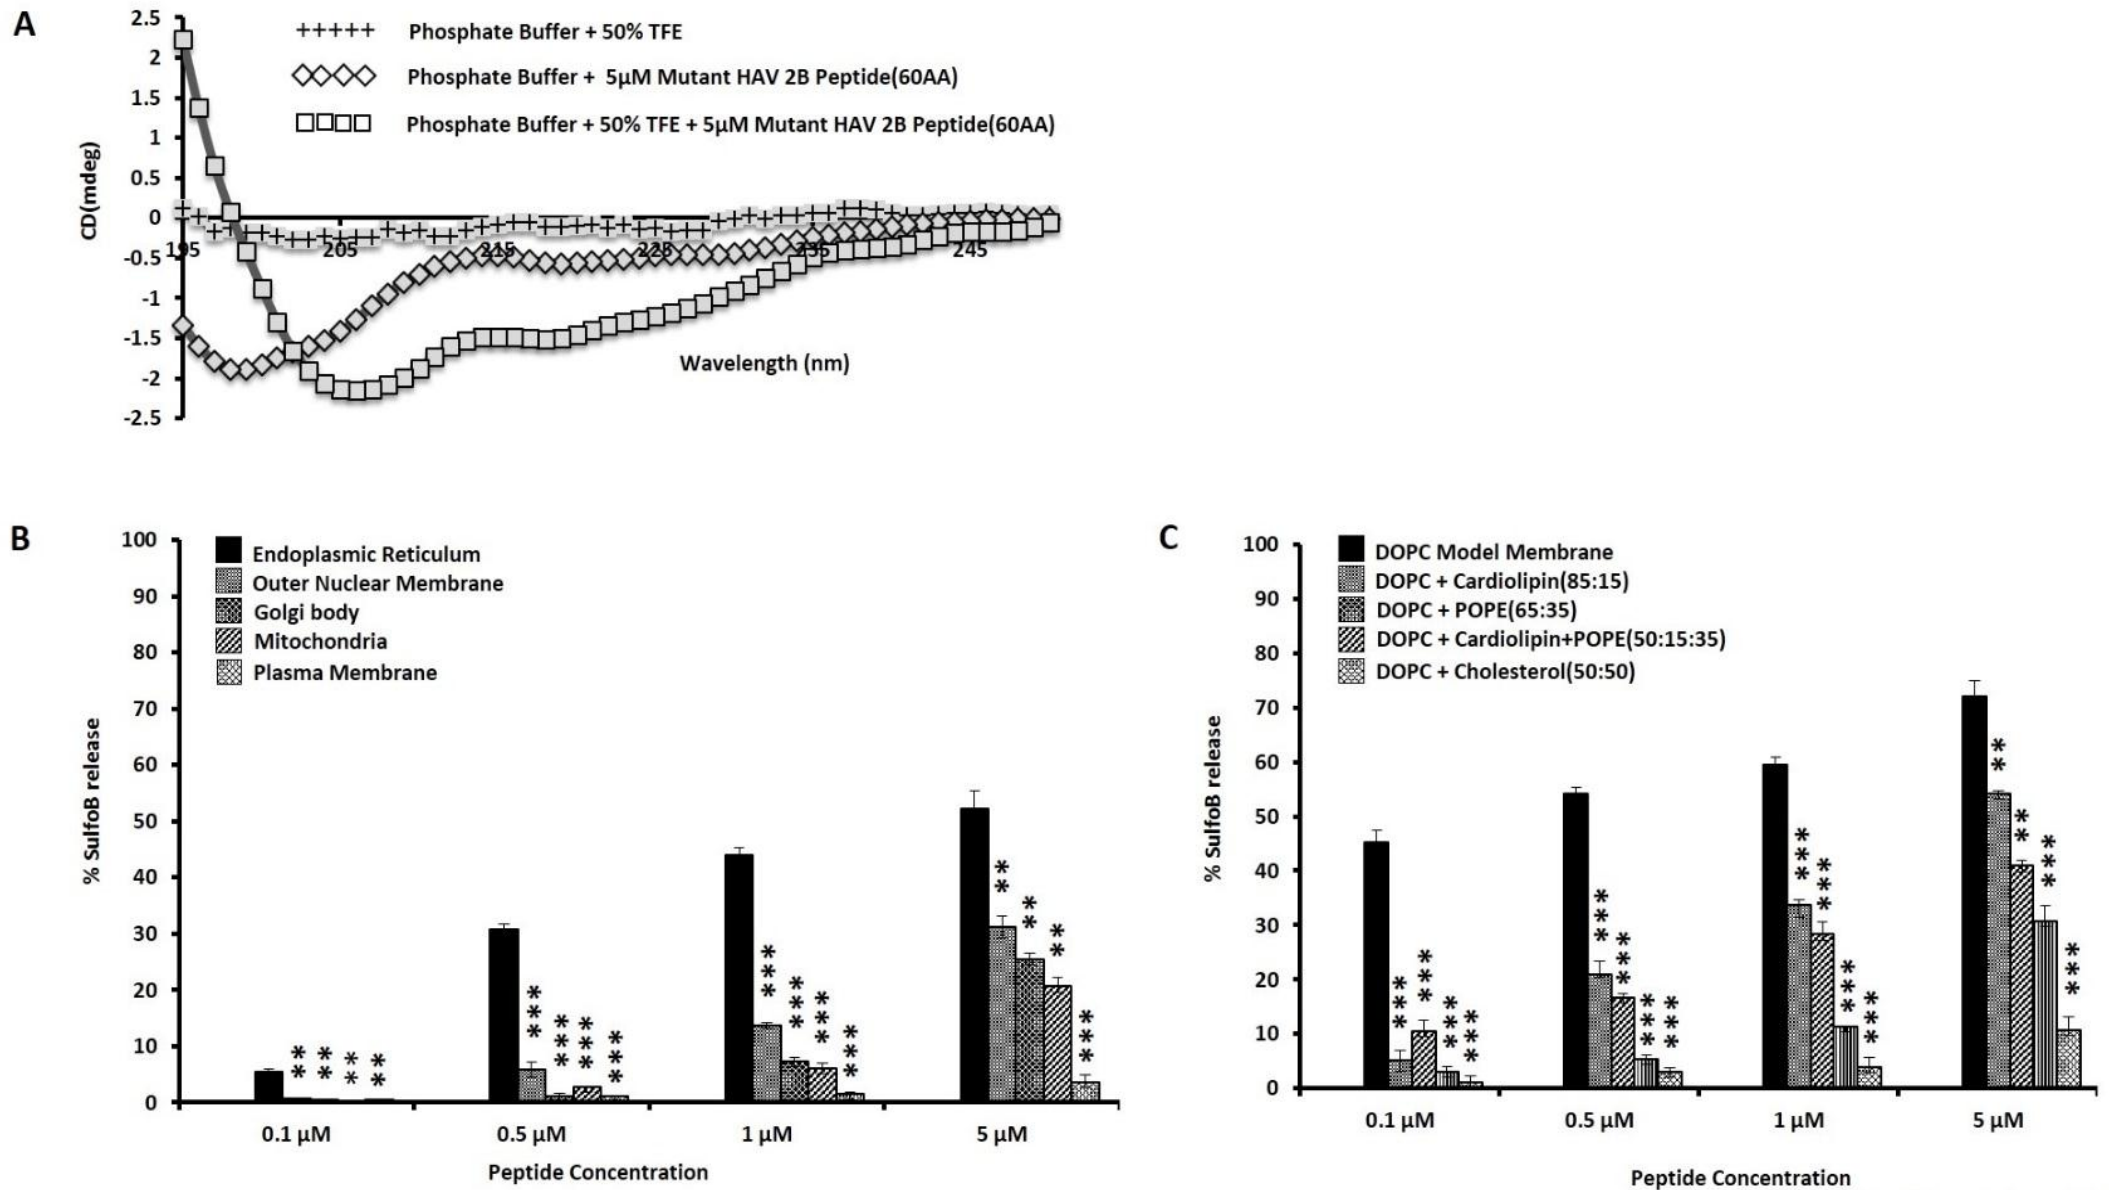

**Supplementary Figure S1 | A).** Circular Dichroism (CD) spectroscopy of the 2B peptide (A216V) at 5 µM in phosphate buffer, pH 7.0, with or without 50% TFE. **B).**

Disruption of liposomes mimicking the membranes of cellular organelles by the 2B (A216V) peptide. Data are represented as the means of the results for triplicate independent samples  $\pm$  the standard deviation (SD). \*\*\*,  $P < 0.001$ ; \*\*,  $P < 0.01$ ; \*,  $P < 0.05$  (Student's  $t$  test in comparison with results for rhodamine dye release in

Endoplasmic reticulum) **C)** Disruption of liposomes composed of different combinations of DOPC, cholesterol, POPE and cardiolipin by the 2B peptide (A216V). Data are represented as the means of the results for triplicate independent samples  $\pm$  the standard deviation (SD). \*\*\*,  $P < 0.001$ ; \*\*,  $P < 0.01$ ; \*,  $P < 0.05$  (Student's  $t$  test in comparison with results for rhodamine dye release in DOPC liposomes.

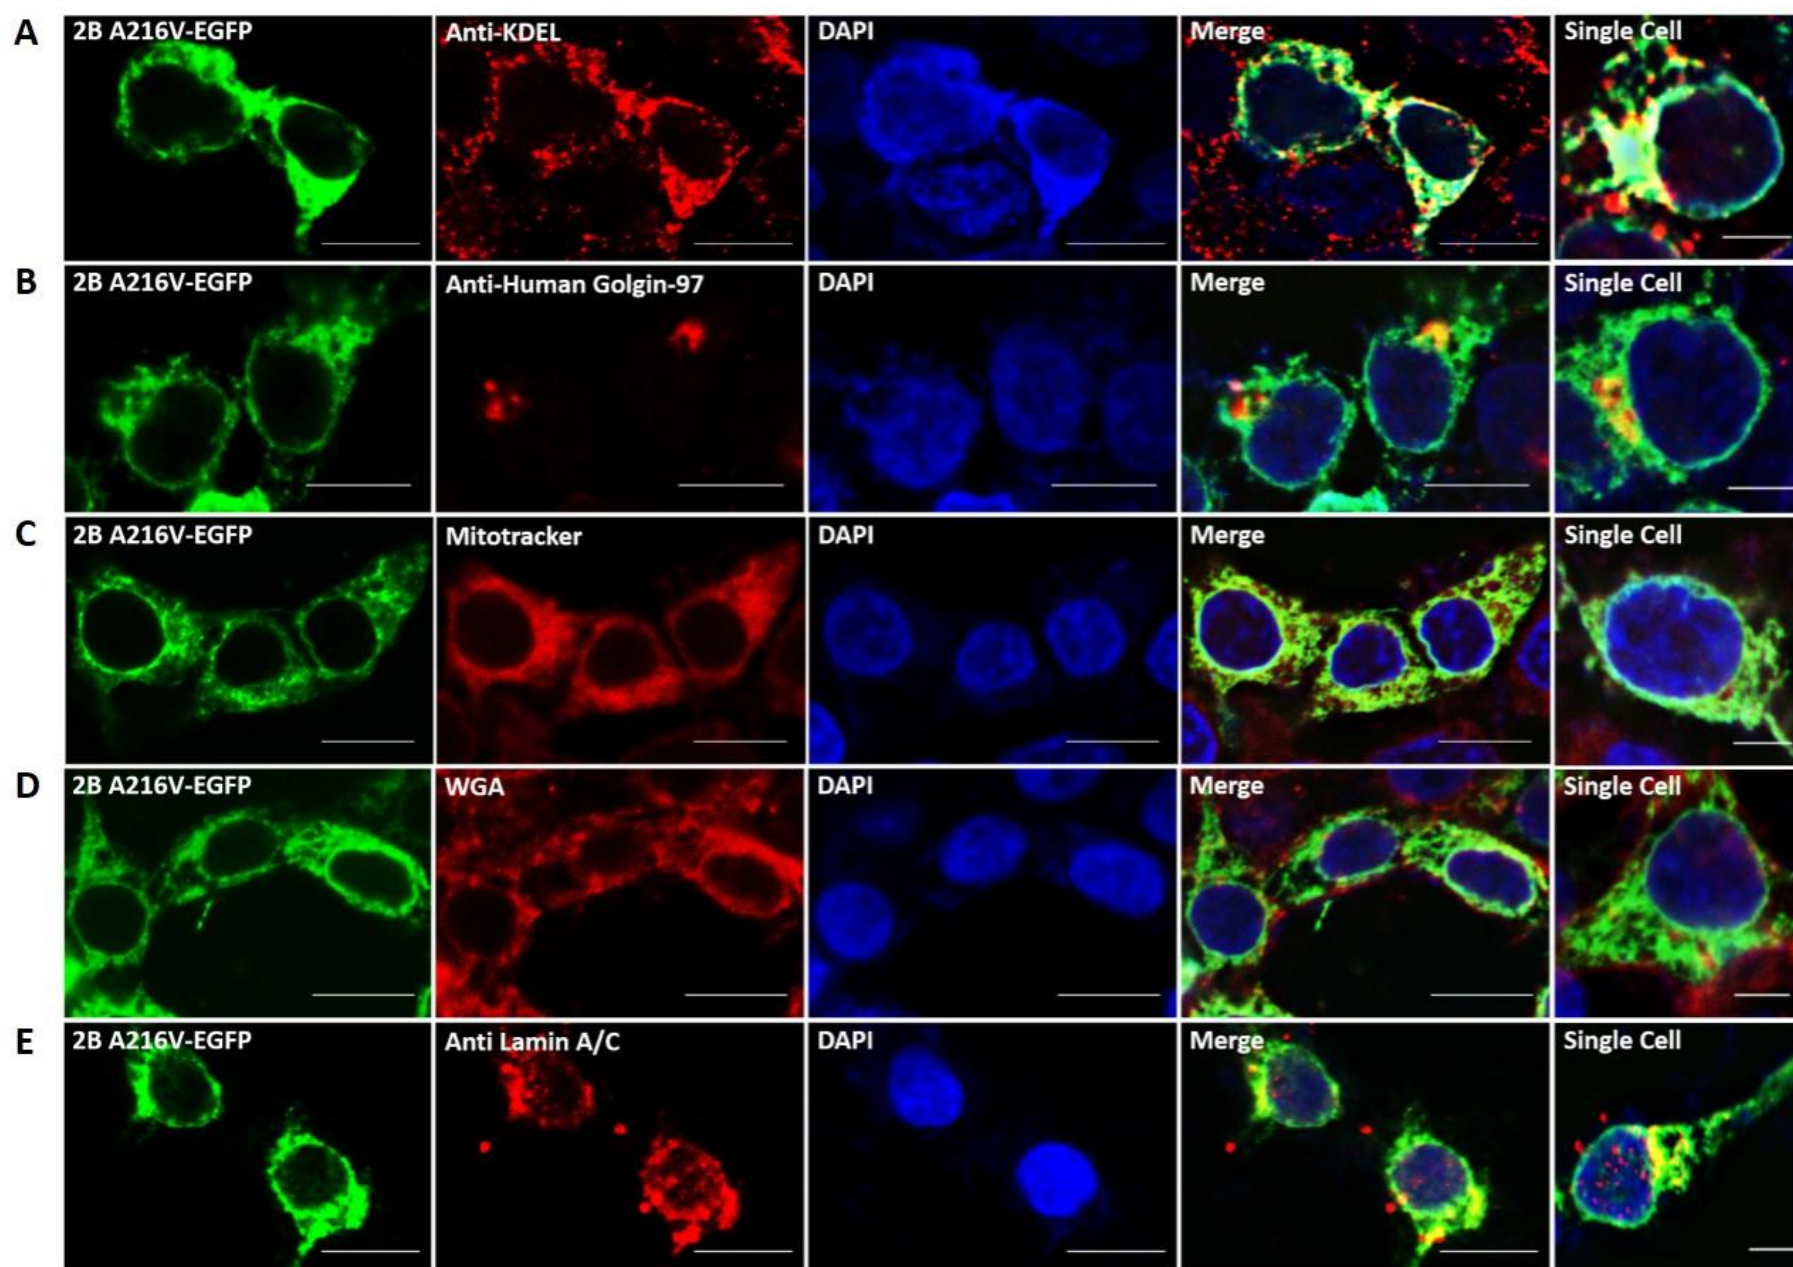

**Supplementary Figure S2** | Co-localization of 2B (A216V) -EGFP with various cellular organelles. HEK293T cells, transfected with 3  $\mu$ g 2B-EGFP (green channel) were fixed, permeabilized (for antibody staining), and immunostained with antibodies/dyes (red channel) as follows: **A**). Anti-KDEL antibody against ER, **B**). Anti-Human Golgin-97 antibody against Golgi bodies, **C**). MitoTracker Red FM against mitochondria, **D**). Wheat Germ Agglutinin (WGA) Alexa Fluor 594 Conjugate against plasma membrane **E**). Anti-Lamin antibody against inner nuclear membrane. Alexa Fluor 555 goat anti-mouse IgG (H+L) was used as secondary antibody and nuclei were counter-stained with 4',6-diamidino-2-phenylindole (DAPI) dihydrochloride (blue channel). The green, red and blue channels have been merged and shown as a separate panel. The last panel shows the view of a single cell for better visualization of colocalization. Pearson's correlation coefficient of  $> 0.5$  (indicating substantial co-localization) was observed for merged panels of **A**) and **B**). The images are representative of cells from at least three areas from three independent experiments. Scale bar - 10  $\mu$ m, 5  $\mu$ m (for single cell).

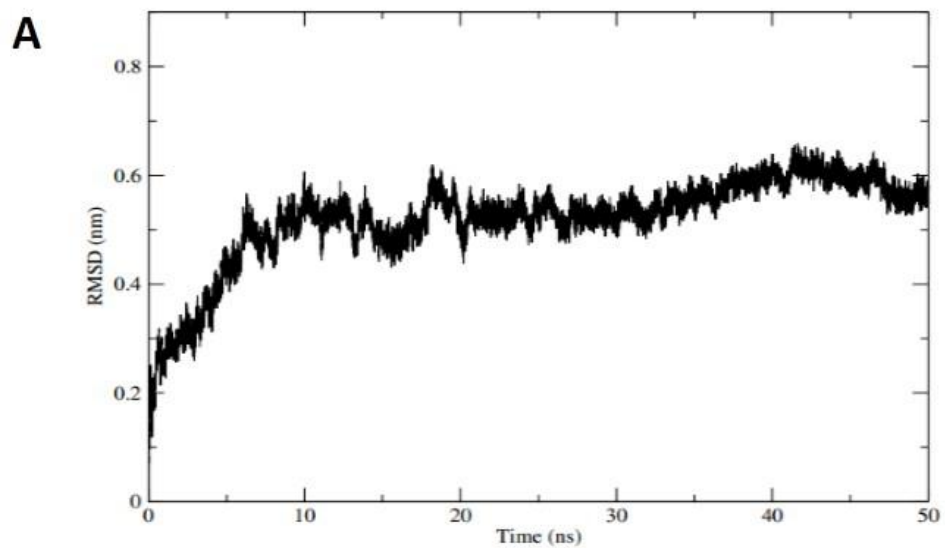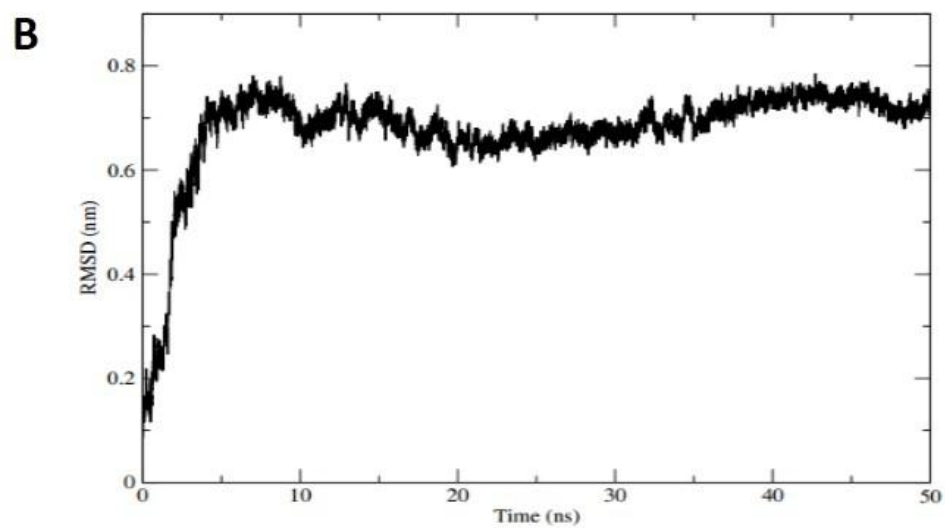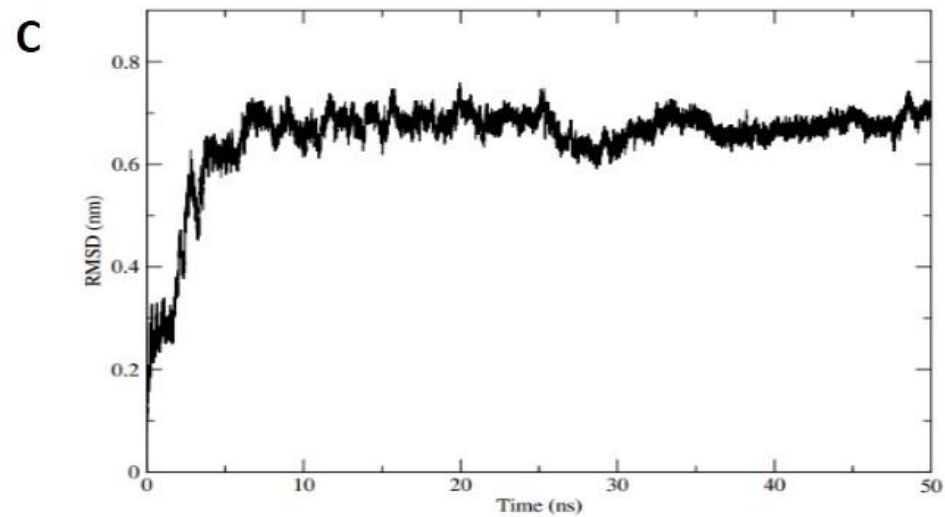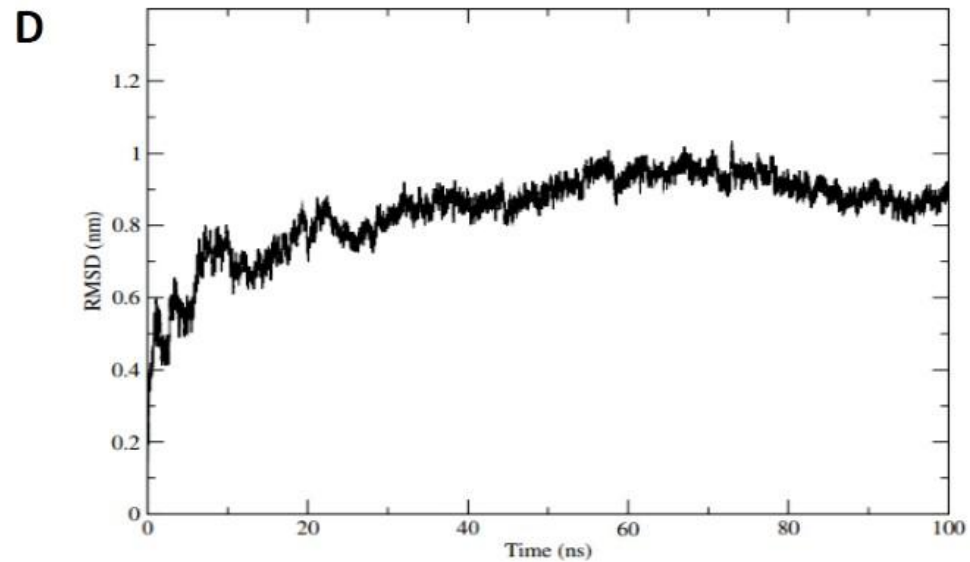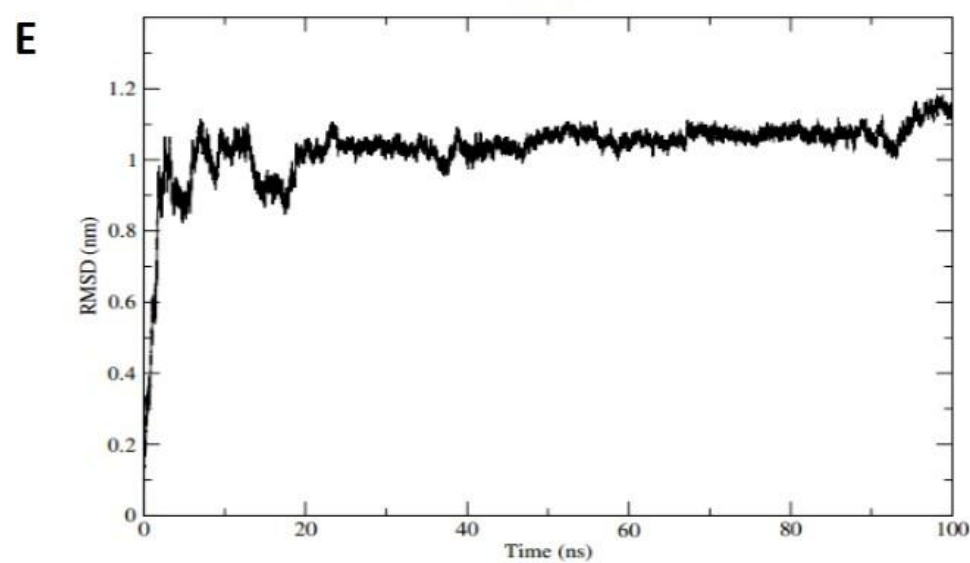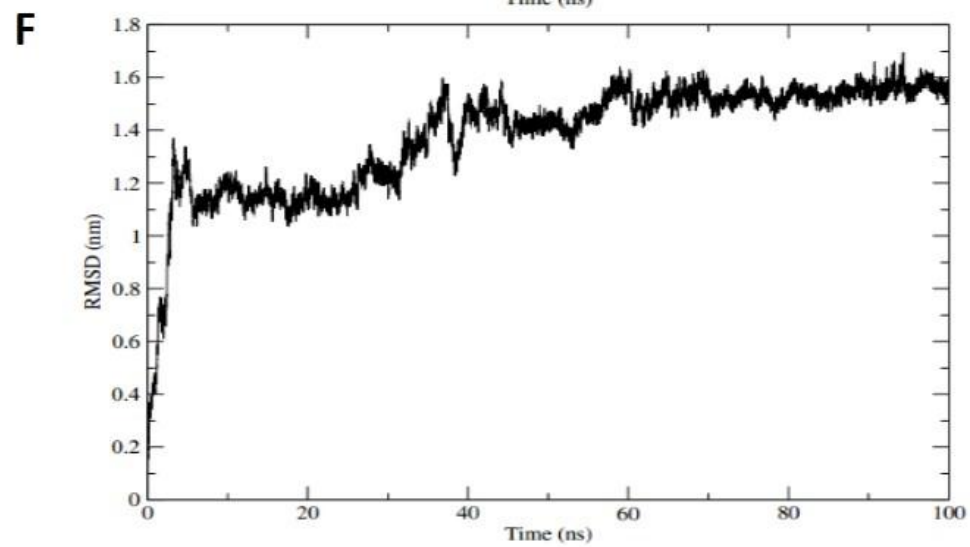

**Supplementary Figure S3** | RMSD plots of the  $C\alpha$  backbones of - (A-C) 2B peptide monomer in different orientations, (D-E) 2B peptide dimer in the same and opposite orientations, and (F) four 2B peptides in water, during simulation.

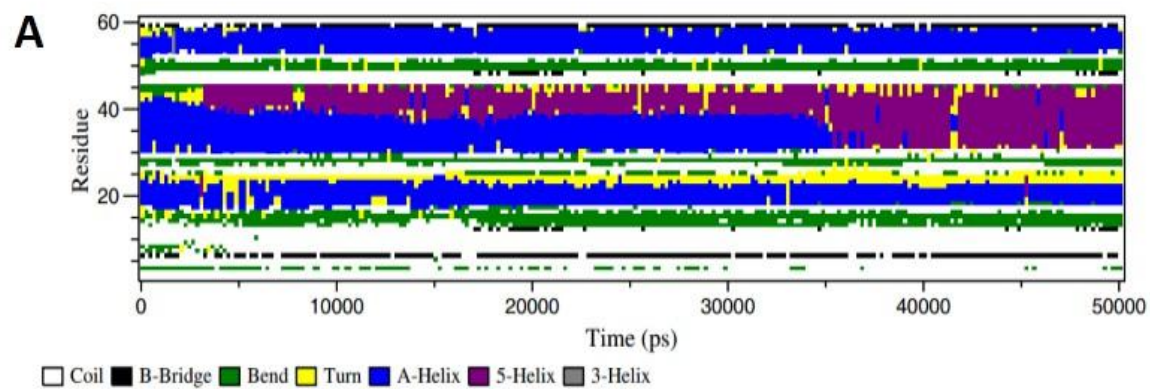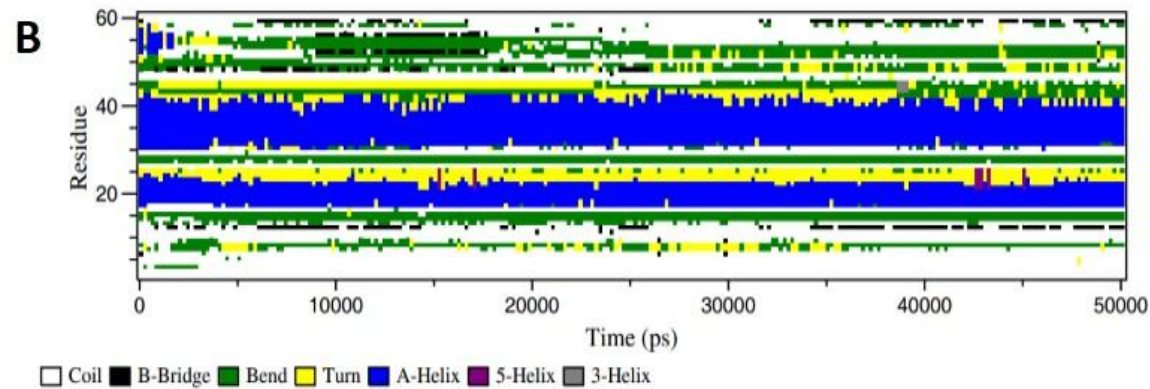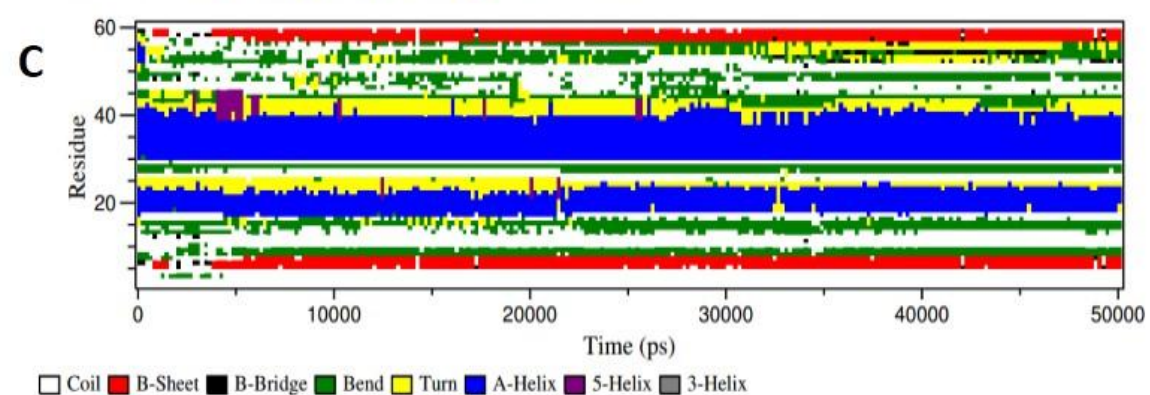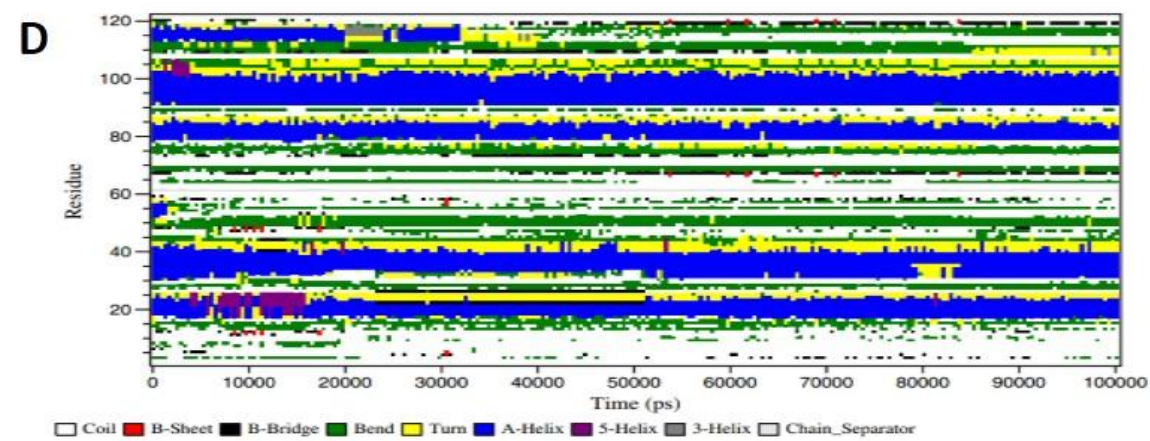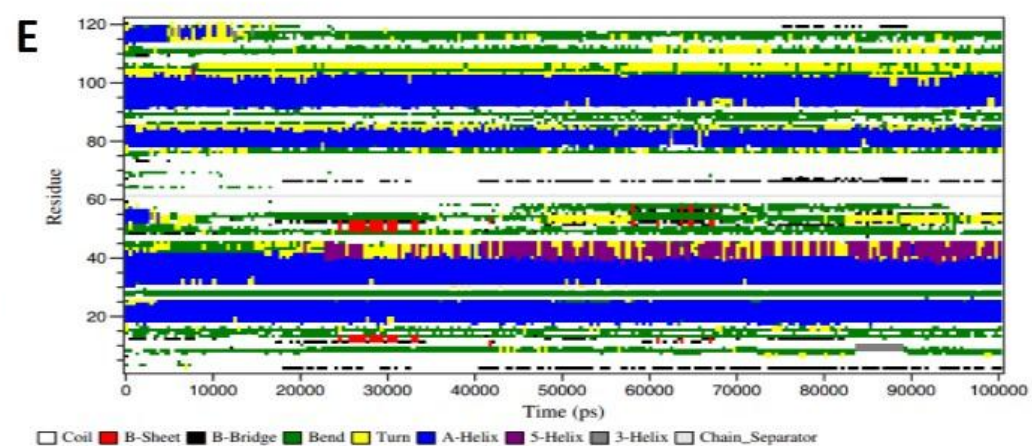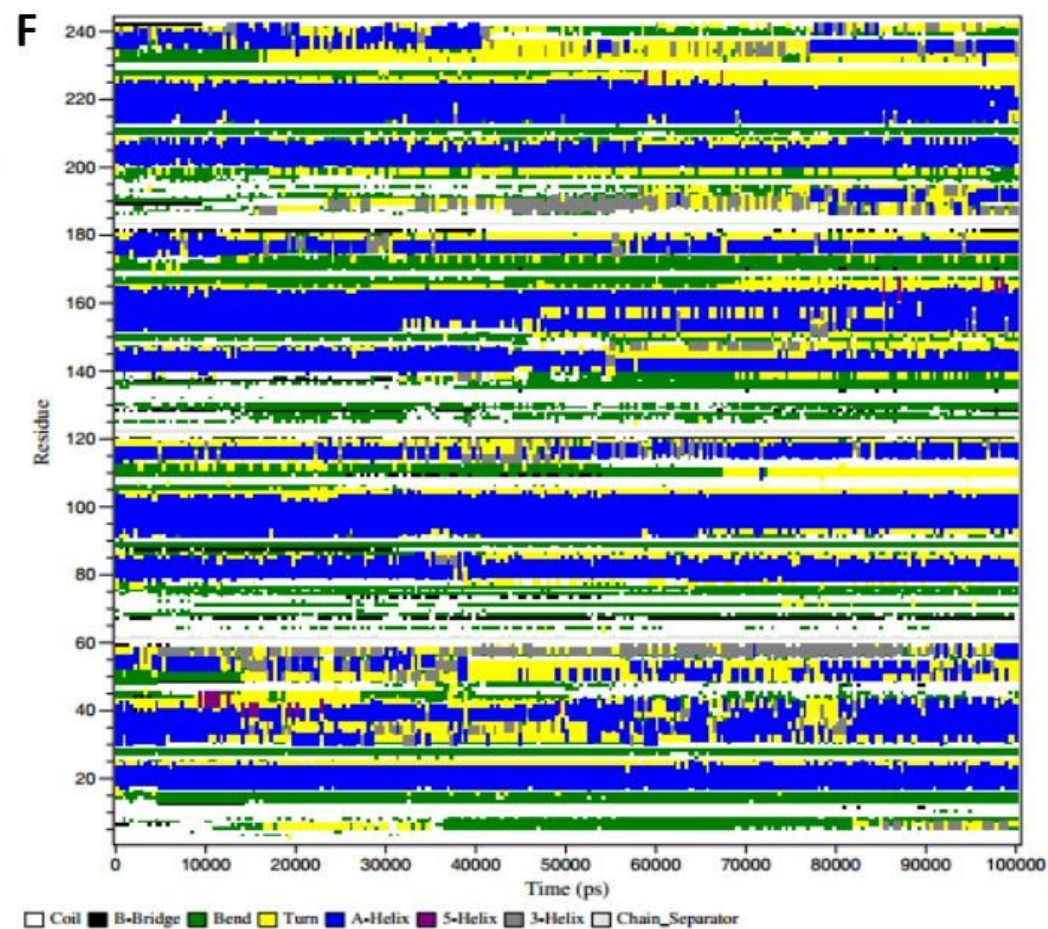

**Supplementary Figure S4** | Evolution of secondary structure elements, over total simulation time, for - (A-C) 2B peptide monomer in different orientations with respect to membrane, (D-E) 2B peptide dimer, in both orientations with respect to membrane and (F) four 2B peptides in water

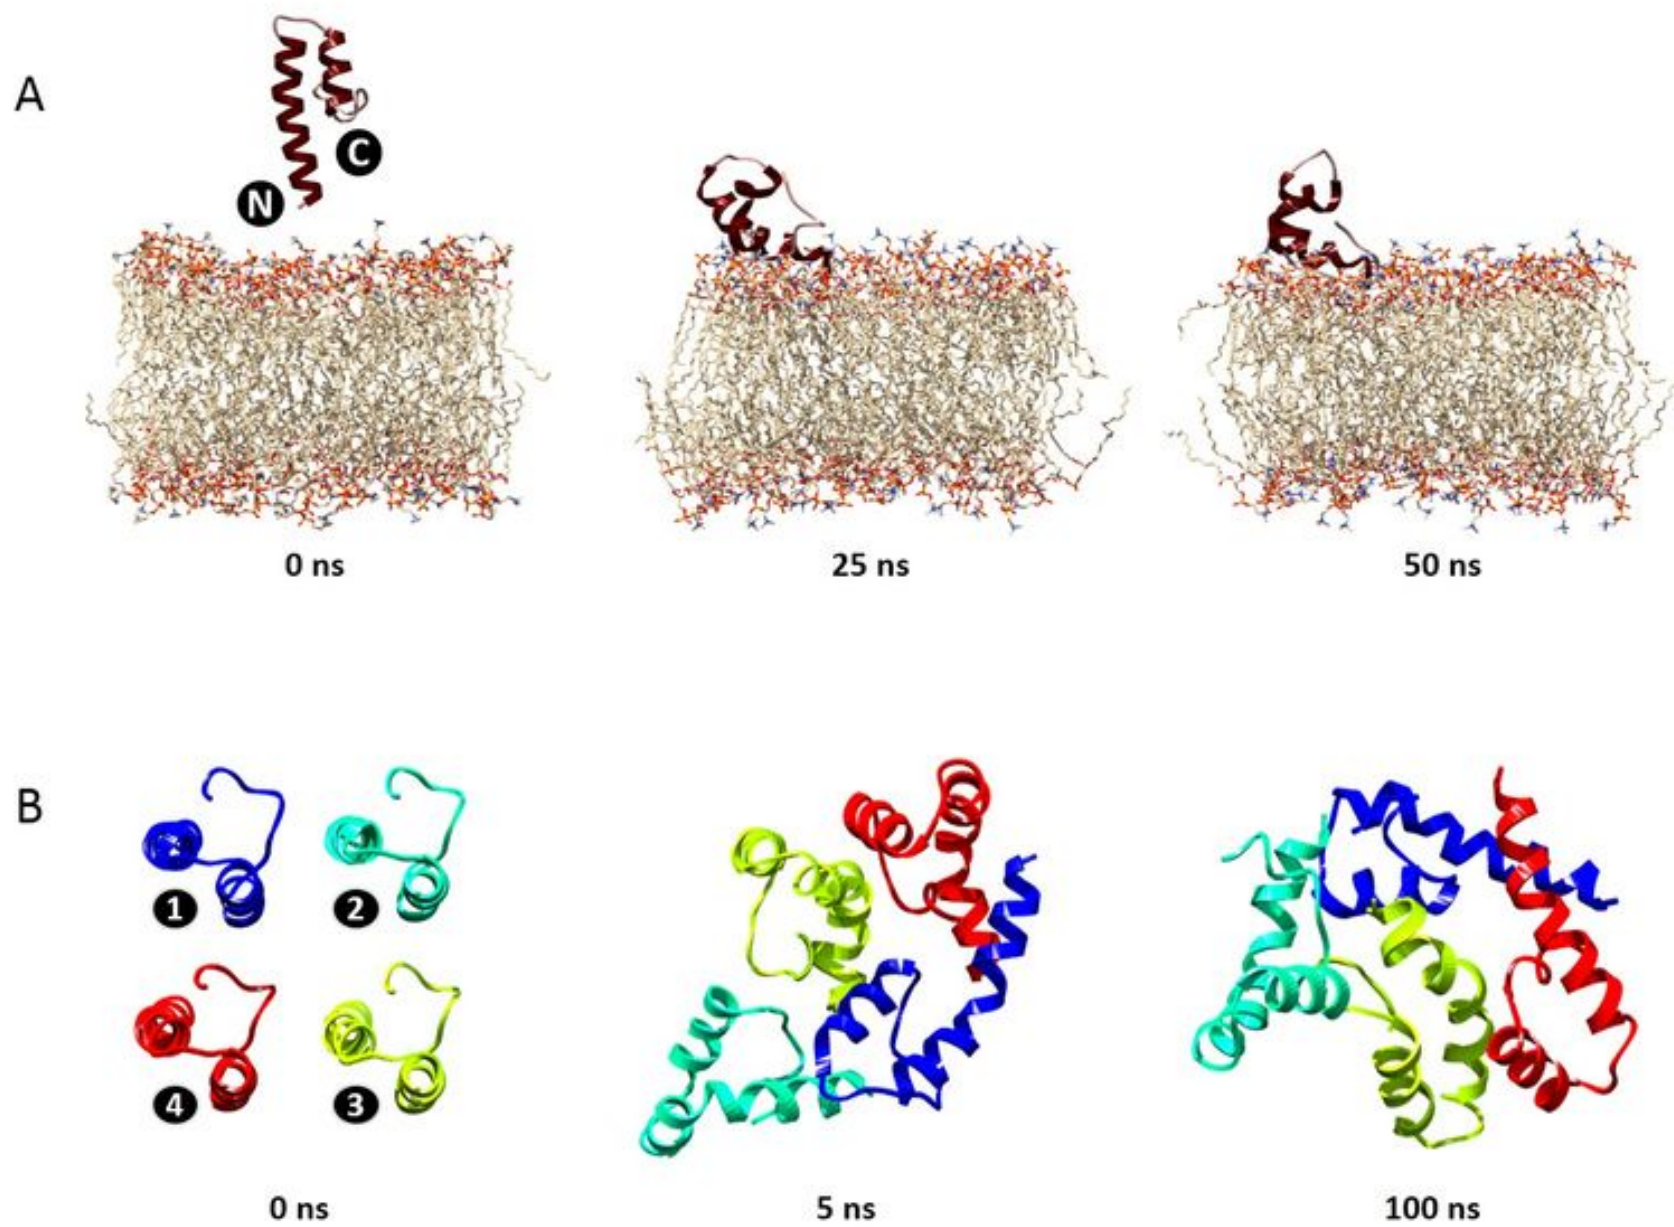

**Supplementary Figure S5 |** (A) Snapshots taken at 0 ns (left panel), 25 ns (middle panel) and 50 ns (right panel) during MD simulation of the poliovirus 2B peptide with both N and C terminus towards membrane. (B) Snapshots, at 0 (left panel), 5 (middle panel) and 100 ns (right panel) during MD simulation of four 2B peptides in water.

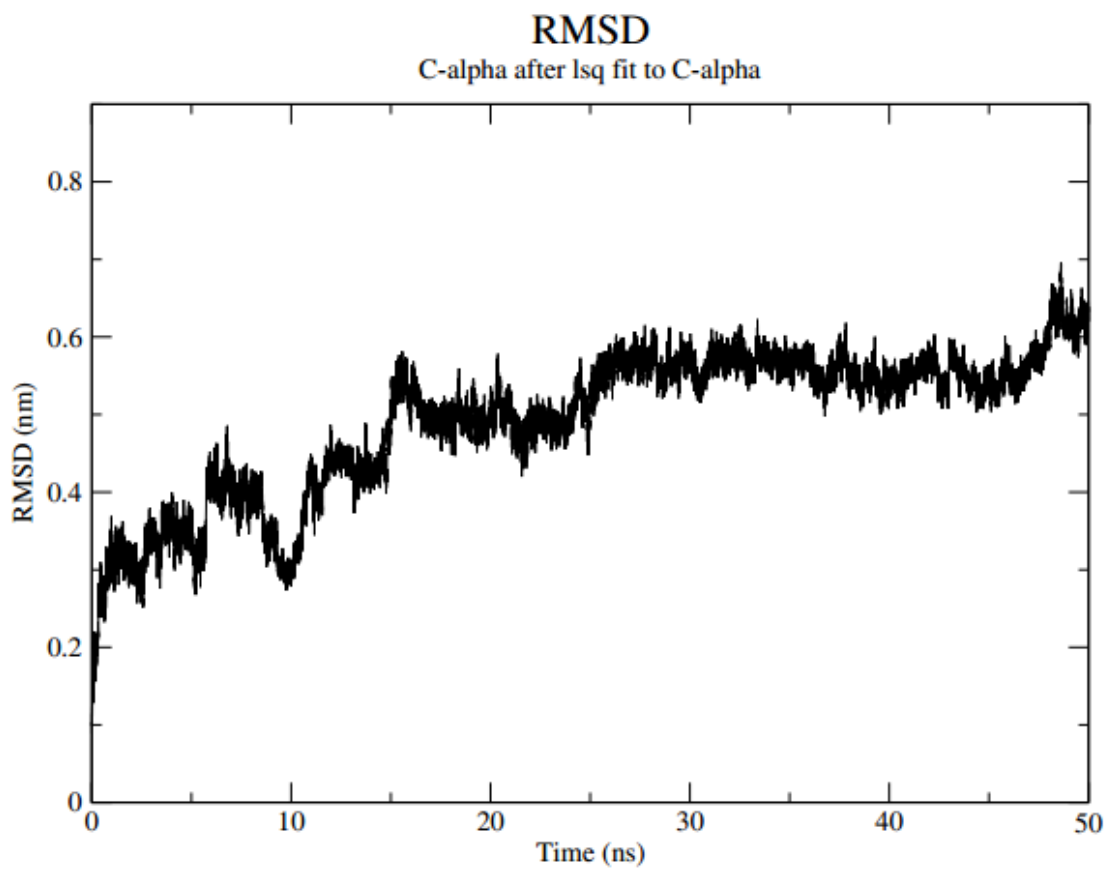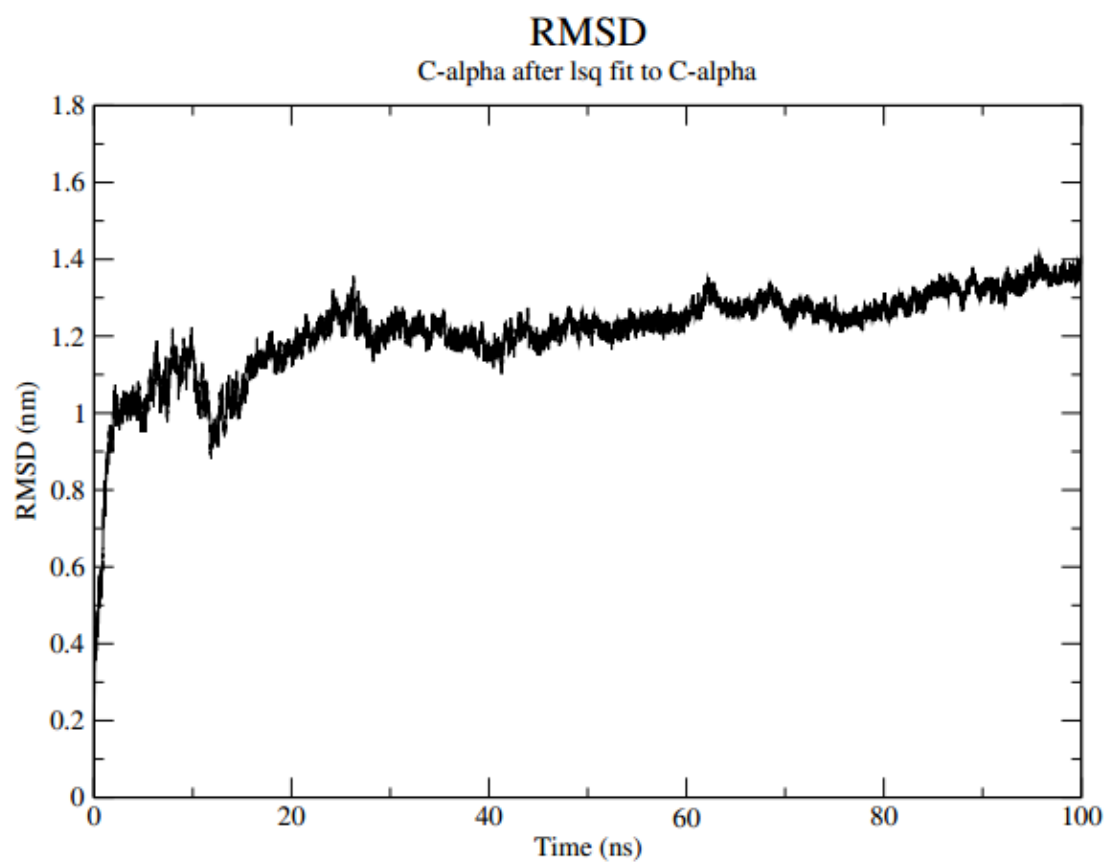

**Supplementary Figure S61** (A) RMSD plots of the C $\alpha$  backbones of poliovirus 2B peptide monomer and (B) four poliovirus 2B peptides in water, during simulation.

**A**

| H-BONDING INTERACTIONS BETWEEN LIPID AND POLIOVIRUS 2B PEPTIDE |              |           |
|----------------------------------------------------------------|--------------|-----------|
| DONOR                                                          | ACCEPTOR     | OCCUPANCY |
| LYS5-Side                                                      | POPC79-Side  | 36.77%    |
| THR1-Main                                                      | POPC108-Side | 55.87%    |
| THR1-Main                                                      | POPC79-Side  | 50.86%    |
| LYS8-Side                                                      | POPC160-Side | 52.52%    |
| LYS5-Side                                                      | POPC67-Side  | 52.74%    |
| LYS12-Side                                                     | POPC135-Side | 24.73%    |
| LYS12-Side                                                     | POPC139-Side | 26.02%    |
| LYS5-Side                                                      | POPC78-Side  | 40.99%    |
| LYS8-Side                                                      | POPC105-Side | 24.28%    |
| GLY38-Main                                                     | POPC130-Side | 58.16%    |
| CYS39-Main                                                     | POPC65-Side  | 30.52%    |
| LYS12-Side                                                     | POPC164-Side | 31.41%    |

**B**

| INTERMOLECULAR H-BONDING BETWEEN PEPTIDE MOLECULES |             |           |
|----------------------------------------------------|-------------|-----------|
| DONOR                                              | ACCEPTOR    | OCCUPANCY |
| SER109-Side                                        | ASP181-Side | 22.98%    |
| ARG116-Side                                        | LEU188-Side | 23.60%    |
| THR48-Side                                         | ALA41-Main  | 27.91%    |
| ILE96-Main                                         | ASP87-Side  | 30.03%    |
| SER110-Side                                        | CYS180-Main | 25.33%    |
| THR95-Side                                         | ASP40-Side  | 21.50%    |
| THR97-Side                                         | CYS39-Main  | 24.49%    |

**C**

| INTERMOLECULAR SALT BRIDGE FORMATION BETWEEN THE POLIOVIRUS 2B MOLECULES |
|--------------------------------------------------------------------------|
| ASP181 AND LYS106                                                        |
| ASP26 AND LYS59                                                          |
| GLU166 AND LYS5                                                          |
| ASP40 AND LYS59                                                          |
| ASP87 AND LYS99                                                          |
| ASP134 AND LYS59                                                         |
| GLU25 AND LYS55                                                          |
| ASP181 AND LYS102                                                        |
| ASP40 AND LYS102                                                         |
| GLU25 AND LYS59                                                          |
| GLU98 AND LYS146                                                         |
| GLU51 AND ARG22                                                          |

**Supplementary Figure S7** | (A) and (B) shows the intermolecular hydrogen bonding interactions between the poliovirus 2B peptide monomer and POPC lipid headgroups and between the four 2B monomers respectively (corresponding to **Supplementary Figure S5(A, B)**). (C) Shows the salt bridge formation between the four interacting 2B peptides in solution (corresponding to **Supplementary Figure S5(B)**).



## Supplementary Tables and legends:

| Algorithm | Membrane protein | No of TM segments (starting amino acid/ ending amino acid) |
|-----------|------------------|------------------------------------------------------------|
| DAS       | Yes              | 2 ( 176/194 – 209/211 )                                    |
| TMHMM     | Yes              | 2 ( 178/198 – 206/225 )                                    |
| TMpred    | Yes              | 2 ( 176/195 – 209/233 )                                    |
| HMMTOP    | Yes              | 2 ( 178/195 – 206/223 )                                    |
| TMSOC     | Yes              | 2 ( 178/195 – 206/223 )                                    |

**Supplementary Table T1** | Computational analysis of viroporin domain in HAV 2B amino acid sequence.

| Liposomes                 | Mammalian Plasma Membrane | Mammalian Outer Nuclear Membrane | Endoplasmic Reticulum | Golgi Body | Mitochondria |
|---------------------------|---------------------------|----------------------------------|-----------------------|------------|--------------|
| Cholesterol               | 50                        | 15                               | 15                    | 20         | 10           |
| Phosphatidyl Choline      | 20                        | 51                               | 52                    | 50         | 40           |
| Phosphatidyl Ethanolamine | 11                        | 20                               | 30                    | 17         | 35           |
| Sphingomyelin             | 13                        | 9                                | 0                     | 10         | 0            |
| Phosphatidyl Serine       | 6                         | 5                                | 3                     | 3          | 0            |
| Cardiolipin               | 0                         | 0                                | 0                     | 0          | 15           |

**Supplementary Table T2** | Molar ratio of various lipids utilized in producing liposomes mimicking the membranes of cellular organelles.

| (A) N-terminus towards POPC membrane |          |           |
|--------------------------------------|----------|-----------|
| Donor                                | Acceptor | Occupancy |
| SER48                                | POPC125  | 70.39%    |
| LYS54                                | POPC19   | 67.92%    |
| LYS54                                | POPC84   | 54.71%    |
| VAL1                                 | POPC23   | 50.54%    |
| LYS58                                | POPC84   | 49.87%    |
| SER51                                | POPC114  | 48.48%    |
| LEU19                                | POPC122  | 41.59%    |
| THR2                                 | POPC23   | 40.50%    |

  

| (B) N-terminus away from POPC membrane |          |           |
|----------------------------------------|----------|-----------|
| Donor                                  | Acceptor | Occupancy |
| VAL1                                   | POPC95   | 74.25%    |
| GLN23                                  | POPC28   | 55.45%    |
| VAL3                                   | POPC84   | 45.13%    |

  

| (C) C-terminus towards POPC membrane |          |           |
|--------------------------------------|----------|-----------|
| Donor                                | Acceptor | Occupancy |
| VAL1                                 | POPC118  | 71.45%    |
| TYR20                                | POPC29   | 48.21%    |
| VAL1                                 | POPC50   | 42.89%    |
| LYS14                                | POPC60   | 41.33%    |

| (D) N and C-terminal region of both peptides oriented towards the membrane |          |           |
|----------------------------------------------------------------------------|----------|-----------|
| Donor                                                                      | Acceptor | Occupancy |
| GLY53                                                                      | POPC87   | 67.91%    |
| LYS54-main                                                                 | POPC20   | 64.95%    |
| CYS52                                                                      | POPC87   | 64.92%    |
| THR62                                                                      | POPC19   | 62.81%    |
| VAL61                                                                      | POPC23   | 55.81%    |
| LYS58                                                                      | POPC27   | 51.77%    |
| LYS114                                                                     | POPC96   | 50.89%    |
| VAL1                                                                       | POPC57   | 50.12%    |
| LYS114                                                                     | POPC84   | 47.44%    |
| LYS54-side                                                                 | POPC20   | 47.42%    |
| LYS118                                                                     | POPC49   | 45.63%    |
| LYS54                                                                      | POPC32   | 45.34%    |
| LYS118                                                                     | POPC84   | 44.69%    |
| LYS54                                                                      | POPC83   | 42.48%    |
| VAL61                                                                      | POPC27   | 40.62%    |

  

| (E) N and C-terminal region of two peptides oriented in opposite direction with respect to each other |          |           |
|-------------------------------------------------------------------------------------------------------|----------|-----------|
| Donor                                                                                                 | Acceptor | Occupancy |
| LYS118                                                                                                | POPC84   | 91.61%    |
| SER15                                                                                                 | POPC95   | 65.48%    |
| LYS14                                                                                                 | POPC96   | 62.23%    |
| GLY16                                                                                                 | POPC91   | 59.37%    |
| LYS114                                                                                                | POPC23   | 55.93%    |
| GLN24                                                                                                 | POPC49   | 49.91%    |
| LYS14                                                                                                 | POPC95   | 48.99%    |
| LYS114                                                                                                | POPC27   | 44.47%    |

**Supplementary Table T3** | Intermolecular hydrogen bonding interactions between the residues of the 2B peptide and lipid headgroups of the membrane in the upper leaflet. (A-C) correspond to **Figure 5 (A-C)** and (D-E) correspond to **Figure 7A**.

| (A) Intermolecular H-bonding between Peptide 1(1-60) and Peptide 2 (61-120) (Figure 7A, Row 1) |          |           |
|------------------------------------------------------------------------------------------------|----------|-----------|
| Donor                                                                                          | Acceptor | Occupancy |
| THR2-side                                                                                      | LEU120   | 33.71%    |
| THR2-main                                                                                      | LEU120   | 33.37%    |

  

| (B) Intermolecular H-bonding between Peptide 1(1-60) and Peptide 2 (61-120) (Figure 7A, Row 2) |          |           |
|------------------------------------------------------------------------------------------------|----------|-----------|
| Donor                                                                                          | Acceptor | Occupancy |
| TYR20                                                                                          | LEU120   | 62.43%    |

| (C) Intermolecular H-bonding between residues Peptide 2 (61-120) and Peptide 3 (121-180) |          |           |
|------------------------------------------------------------------------------------------|----------|-----------|
| Donor                                                                                    | Acceptor | Occupancy |
| VAL129                                                                                   | GLU64    | 39.77%    |
| THR128                                                                                   | GLU64    | 32.59%    |

| (D) Salt bridge between Peptide 2 (61-120) and Peptide 3 (121-180) |                   |
|--------------------------------------------------------------------|-------------------|
|                                                                    | Asp104 and Lys174 |
|                                                                    | Asp88 and Lys134  |

**Supplementary Table T4** | Intermolecular hydrogen bonding interactions between the residues of - (A-B) 2B peptide dimers in both orientations (corresponding to **Figure 7A**) and (C) interacting 2B peptides in solution (corresponding to **Figure 6C**). (D) shows salt bridge formation between the interacting pair of 2B peptides in solution (corresponding to **Figure 6C**).
